# Supplementary material for: Validation of a Low-protein Semi-Quantitative Food Frequency Questionnaire
Source: MDPI journal article supplement (doi:10.3390/nu14081595), 2022-04-12
Supplement: s1 [file s1]

Table S1: Gender, age and mean z-scores for BMI, weight and height for PKU and control children

|                             | PKU Group       | Control Group   | P value* |
|-----------------------------|-----------------|-----------------|----------|
| Gender                      | 24M, 26F        | 24M, 26F        | 0.99     |
| Mean age years (range)      | 9.3 (4.2-16.4)  | 9.3 (4.2-16.6)  | 0.99     |
| Mean weight z-score (range) | 0.76 (-2.0-2.4) | 0.66 (-2.3-2.6) | 0.54     |
| Mean height z-score (range) | 0.26 (-2.4-2.4) | 0.60 (-2.1-2.8) | 0.14     |
| Mean BMI z-score (range)    | 0.87 (-1.0-2.9) | 0.47 (-3.4-2.7) | 0.17     |

NS=not significant; \*Mann Whitney

Table S2: FFQ food items mean g/week FFQ1 vs FFQ2 (PKU and Control)

|                                   | No. children consuming FFQ1/FFQ2 n=50 | PKU FFQ1    | PKU FFQ 2   | Wilcoxon signed rank | Spearman rank correlation | FFQ1/FFQ2 n=50 | Control FFQ 1 | Control FFQ 2 | Wilcoxon signed rank | Spearman rank correlation |
|-----------------------------------|---------------------------------------|-------------|-------------|----------------------|---------------------------|----------------|---------------|---------------|----------------------|---------------------------|
|                                   | n                                     | Mean g/week | Mean g/week | p                    | r                         | n              | Mean g/week   | Mean g/week   | p                    | r                         |
| Milk, cows                        | 2/3                                   | 12.6        | 15          | >0.99                | 0.82                      | 48/46          | 1882          | 1782          | 0.41                 | 0.71                      |
| plant milk                        | 4/7                                   | 49          | 67.2        | 0.06                 | 0.77                      | 1/1            | 56            | 56            | 0.99                 | 1.0                       |
| LP milk                           | 42/40                                 | 1421        | 1509        | 0.54                 | 0.92                      |                |               |               |                      |                           |
| milk flavouring                   | 6/8                                   | 3.3         | 6.3         | 0.07                 | 0.52                      | 18/16          | 14.1          | 14.3          | 0.51                 | 0.68                      |
| cheese                            | 3/3                                   | 3.7         | 1.8         | 0.50                 | 0.99                      | 47/45          | 88.2          | 87.4          | 0.75                 | 0.60                      |
| soft cheese                       | 5/4                                   | 6.6         | 5.9         | 0.62                 | 0.89                      | 9/15           | 6.8           | 12.8          | <b>0.04</b>          | 0.67                      |
| LP cheese                         | 31/34                                 | 66.4        | 80.4        | 0.10                 | 0.66                      |                |               |               |                      |                           |
| soya cheese                       | 1/0                                   | 1.2         | 0           | >0.99                | -                         |                |               |               |                      |                           |
| dairy desserts                    | 18/17                                 | 70          | 51.6        | 0.22                 | 0.78                      | 44/41          | 254           | 182           | <b>0.0002</b>        | 0.72                      |
| LP desserts                       | 6/10                                  | 21.6        | 23.4        | 0.82                 | 0.46                      |                |               |               |                      |                           |
| icecream                          | 12/15                                 | 22.8        | 20.4        | 0.48                 | 0.60                      | 31/27          | 46.8          | 49.2          | 0.37                 | 0.61                      |
| LP ice cream                      | 12/10                                 | 34.5        | 12.6        | <b>0.03</b>          | 0.42                      |                |               |               |                      |                           |
| milk based ice lolly              | 6/7                                   | 11.7        | 9           | 0.68                 | 0.43                      | 4/6            | 3.6           | 6.3           | 0.38                 | 0.54                      |
| fruit based ice lolly             | 21/20                                 | 62.1        | 58.5        | 0.51                 | 0.56                      | 14/15          | 44.1          | 40.5          | 0.60                 | 0.45                      |
| cream                             | 2/2                                   | 1.2         | 1.8         | >0.99                | 0.47                      | 6/11           | 6.6           | 11.4          | 0.09                 | 0.57                      |
| bread                             | 2/3                                   | 14.4        | 19.8        | 0.50                 | 0.82                      | 49/44          | 281           | 242           | 0.12                 | 0.61                      |
| rolls etc                         | 3/1                                   | 3           | 2           | >0.99                | 0.04                      | 30/35          | 136           | 142           | 0.97                 | 0.79                      |
| LP bread                          | 45/45                                 | 441         | 421         | 0.80                 | 0.78                      |                |               |               |                      |                           |
| LP rolls etc                      | 17/24                                 | 58          | 61          | 0.08                 | 0.39                      |                |               |               |                      |                           |
| GF bread                          | 10/7                                  | 19.8        | 7.8         | <b>0.04</b>          | 0.52                      |                |               |               |                      |                           |
| GF rolls etc                      | 4/7                                   | 9           | 9.5         | 0.98                 | 0.50                      |                |               |               |                      |                           |
| Breakfast cereal - wheat          | 14/20                                 | 23.1        | 22.4        | 0.60                 | 0.76                      | 34/30          | 97.2          | 73.2          | <b>0.02</b>          | 0.73                      |
| Breakfast cereal - corn/rice/ oat | 29/24                                 | 49.5        | 33.2        | <b>0.04</b>          | 0.72                      | 31/35          | 54.6          | 49.8          | 0.43                 | 0.79                      |
| Oats/porridge                     |                                       |             |             |                      |                           | 13/11          | 90.8          | 93.8          | 0.93                 | 0.58                      |
| LP breakfast cereal               | 9/7                                   | 9.6         | 12.9        | 0.50                 | 0.71                      |                |               |               |                      |                           |
| sweet spreads                     | 26/28                                 | 40.2        | 32.7        | 0.27                 | 0.83                      | 27/25          | 17.2          | 12.5          | 0.26                 | 0.64                      |
| chocolate/nut spread              | 13/12                                 | 24.2        | 10.8        | 0.67                 | 0.49                      | 19/19          | 17.4          | 15.8          | 0.74                 | 0.85                      |
| LP chocolate spread               | 9/8                                   | 6.2         | 6.4         | >0.99                | 0.48                      |                |               |               |                      |                           |
| sandwich spread                   | 2/1                                   | 2           | 0.8         | 0.50                 | 0.71                      | 15/13          | 15.8          | 11.4          | 0.34                 | 0.71                      |
| LP savoury spread                 | 3/6                                   | 2.4         | 8.4         | 0.06                 | 0.45                      |                |               |               |                      |                           |

|                                 |       |      |      |              |      |       |      |      |              |      |
|---------------------------------|-------|------|------|--------------|------|-------|------|------|--------------|------|
| butter/ margarine/ oil          | 47/44 | 86.9 | 84.9 | 0.92         | 0.64 | 50/47 | 50.1 | 43.6 | 0.42         | 0.31 |
| Low fat spread                  | 0/3   | 0    | 3.4  | 0.25         | -    | 6/4   | 3.3  | 2.6  | 0.93         | 0.32 |
| Pasta/ rice/ couscous           | 15/14 | 33.3 | 34.2 | 0.80         | 0.75 | 49/49 | 331  | 334  | 0.86         | 0.51 |
| LP pasta/ rice/ couscous        | 43/43 | 369  | 376  | 0.77         | 0.81 |       |      |      |              |      |
| tinned pasta                    | 17/9  | 56   | 26   | <b>0.003</b> | 0.50 | 5/8   | 17.6 | 27.2 | 0.86         | 0.43 |
| LP ready meal / Ready meal      | 4/4   | 16   | 24   | 0.77         | 0.20 | 9/5   | 24   | 16   | 0.52         | 0.55 |
| potato - boil/ mash/ jacket     | 42/36 | 201  | 189  | 0.69         | 0.57 | 41/44 | 234  | 222  | 0.55         | 0.50 |
| potato - roast/ chips/ fried    | 44/46 | 207  | 186  | 0.26         | 0.51 | 47/44 | 176  | 151  | 0.34         | 0.39 |
| potato - processed              | 28/27 | 60.3 | 54.6 | 0.63         | 0.67 | 19/18 | 25.8 | 27   | 0.83         | 0.94 |
| table sauce                     | 38/37 | 92.4 | 87.4 | 0.38         | 0.79 | 44/44 | 64.4 | 70.4 | 0.34         | 0.55 |
| gravy                           | 27/26 | 60   | 52   | 0.80         | 0.70 | 32/31 | 54.5 | 42   | 0.06         | 0.72 |
| mayonnaise/ dressing            | 26/26 | 60.4 | 42.4 | 0.25         | 0.92 | 13/18 | 12.4 | 18.8 | <b>0.007</b> | 0.62 |
| milk sauces                     | 6/4   | 8.5  | 9    | 0.65         | 0.12 | 17/16 | 25   | 23   | 0.73         | 0.50 |
| LP sauce                        | 3/2   | 8    | 3    | >0.99        | 0.38 |       |      |      |              |      |
| pasta sauce                     | 32/34 | 187  | 152  | 0.58         | 0.38 | 35/39 | 123  | 132  | 0.32         | 0.51 |
| soup                            | 27/25 | 238  | 266  | 0.77         | 0.69 | 14/16 | 94   | 80   | 0.78         | 0.49 |
| vegetables >100mg Phe/100g      | 30/34 | 59.4 | 73.5 | <b>0.03</b>  | 0.68 | 49/48 | 263  | 275  | 0.48         | 0.68 |
| vegetables 75-100mg Phe/100g    | 36/35 | 113  | 118  | 0.73         | 0.68 | 39/41 | 184  | 202  | 0.90         | 0.80 |
| vegetables <75mg Phe/100g       | 50/49 | 625  | 805  | <b>0.01</b>  | 0.76 | 50/50 | 554  | 563  | 0.70         | 0.59 |
| legumes                         | 15/16 | 31.8 | 24.8 | 0.77         | 0.85 | 37/37 | 154  | 140  | 0.80         | 0.82 |
| fruit                           | 45/44 | 915  | 941  | 0.79         | 0.74 | 48/50 | 939  | 954  | 0.62         | 0.65 |
| dried fruit                     | 17/16 | 35.4 | 33.9 | 0.78         | 0.35 | 18/21 | 31.8 | 33.9 | 0.78         | 0.52 |
| meat                            |       |      |      |              |      | 48/48 | 303  | 278  | 0.36         | 0.57 |
| fish                            |       |      |      |              |      | 35/33 | 78   | 72.6 | 0.43         | 0.81 |
| processed meat/fish             |       |      |      |              |      | 50/49 | 198  | 182  | 0.31         | 0.49 |
| ham/sandwich slices             |       |      |      |              |      | 33/35 | 37.7 | 38.7 | 0.83         | 0.76 |
| LP burger/ sausage              | 23/26 | 135  | 168  | 0.95         | 0.82 |       |      |      |              |      |
| veg burger/sausage/tofu/quorn   | 13/15 | 52.5 | 36   | 0.90         | 0.66 | 6/8   | 6    | 9    | 0.53         | 0.50 |
| eggs                            | 0/0   | 0    | 0    | -            | -    | 29/27 | 74.5 | 65   | 0.49         | 0.84 |
| Pizza                           | 3/3   | 8.4  | 11.2 | >0.99        | 0.65 | 41/36 | 107  | 77.2 | <b>0.02</b>  | 0.52 |
| LP pizza                        | 30/31 | 108  | 103  | 0.75         | 0.69 |       |      |      |              |      |
| meat pie/ pastie                | 1/0   | 0.5  | 0    | >0.99        | -    | 26/25 | 29   | 30   | 0.95         | 0.33 |
| vegetable pie/ pastie           | 7/6   | 13   | 10   | 0.68         | 0.25 | 1/2   | 1    | 2    | >0.99        | 0.03 |
| meat curry/ chinese/ lasagne    | 0/0   | 0    | 0    | -            | -    | 27/25 | 126  | 104  | 0.44         | 0.31 |
| vegetable curry/chinese/lasagne | 16/15 | 160  | 64   | 0.12         | 0.47 | 3/3   | 12   | 10   | >0.99        | 0.30 |
| water                           | 47/45 | 4633 | 5096 | 0.73         | 0.48 | 43/46 | 3766 | 3700 | 0.62         | 0.69 |
| fruit juice                     | 28/26 | 648  | 520  | 0.75         | 0.57 | 27/22 | 568  | 572  | 0.27         | 0.75 |
| smoothie                        | 10/11 | 76   | 118  | 0.17         | 0.58 | 12/11 | 112  | 100  | 0.54         | 0.74 |
| sweet drinks                    | 33/32 | 1176 | 1686 | <b>0.01</b>  | 0.64 | 17/15 | 372  | 305  | 0.35         | 0.76 |
| sugar-free drinks               | 11/9  | 580  | 420  | 0.72         | 0.43 | 33/33 | 2252 | 2394 | 0.33         | 0.75 |
| tea/ coffee                     | 17/19 | 316  | 416  | 0.15         | 0.79 | 11/11 | 184  | 184  | 0.78         | 0.61 |
| hot chocolate powder            | 3/1   | 0.9  | 0.3  | 0.50         | 0.57 | 17/13 | 9.3  | 16.2 | 0.16         | 0.66 |
| non-dairy creamer               | 0/2   | 0    | 0.9  | 0.50         | -    | 0/0   | 0    | 0    | -            | -    |
| biscuits                        | 15/15 | 13.5 | 22.5 | 0.21         | 0.38 | 43/43 | 87.2 | 77.4 | 0.26         | 0.66 |
| cake                            | 9/8   | 20.5 | 15   | 0.44         | 0.54 | 40/38 | 123  | 116  | 0.81         | 0.59 |
| cereal bar                      | 20/17 | 19.6 | 19.6 | 0.82         | 0.77 | 23/24 | 31.2 | 27.2 | 0.51         | 0.50 |
| LP biscuit                      | 30/27 | 58.8 | 50.1 | 0.52         | 0.59 |       |      |      |              |      |
| LP cake                         | 29/30 | 139  | 118  | 0.23         | 0.66 |       |      |      |              |      |
| LP cereal bar                   | 13/18 | 38.4 | 33.2 | 0.87         | 0.56 |       |      |      |              |      |

|                         |       |      |      |       |      |       |      |      |      |      |
|-------------------------|-------|------|------|-------|------|-------|------|------|------|------|
| puddings                | 1/3   | 1.6  | 14.4 | 0.38  | 0.04 | 22/27 | 81.6 | 76.8 | 0.82 | 0.52 |
| LP puddings             | 10/9  | 40   | 32   | 0.91  | 0.24 |       |      |      |      |      |
| jelly                   | 1/1   | 2    | 4    | >0.99 | 0.02 | 10/10 | 36   | 38   | 0.94 | 0.75 |
| LP jelly                | 17/23 | 118  | 108  | 0.89  | 0.71 |       |      |      |      |      |
| chocolate               | 9/6   | 12   | 6.3  | 0.12  | 0.65 | 44/45 | 76.2 | 76.2 | 0.88 | 0.52 |
| LP chocolate            | 25/24 | 34.8 | 39   | 0.59  | 0.58 |       |      |      |      |      |
| gummy sweets            | 1/3   | 4.2  | 7.8  | 0.50  | 0.59 | 26/28 | 34.8 | 39.6 | 0.25 | 0.73 |
| vegetarian gummy sweets | 28/29 | 53.1 | 75.9 | 0.86  | 0.09 |       |      |      |      |      |
| other sweets            | 11/15 | 30.6 | 29.9 | 0.99  | 0.11 | 10/7  | 9.6  | 14.4 | 0.56 | 0.69 |
| sugar                   | 19/17 | 19.0 | 15.9 | 0.95  | 0.61 | 10/6  | 5.6  | 4.35 | 0.25 | 0.66 |
| crisps                  | 45/45 | 72.3 | 67.2 | 0.23  | 0.81 | 43/42 | 50.1 | 48.3 | 0.17 | 0.85 |
| nuts/ seeds             | 0/0   | 0    | 0    | -     | -    | 9/9   | 3.8  | 2    | 0.18 | 0.44 |
| LP crisps               | 4/2   | 7    | 2.5  | 0.63  | 0.66 |       |      |      |      |      |
| crackers                | 8/6   | 5.4  | 6.2  | 0.95  | 0.23 | 27/26 | 14.5 | 11   | 0.02 | 0.80 |
| LP crackers             | 16/13 | 9.2  | 8.1  | 0.49  | 0.74 |       |      |      |      |      |

n = number respondents consuming that food item; blue: PKU foods only; purple: Control foods only;

:- no; LP=low protein; GF=gluten free; Phe=phenylalanine;

Table S3: FFQ items mean g/week FFQ vs Dietary recalls (PKU and Control)

|                                | No. children<br>consuming<br>food<br>FFQ/<br>Recall | PKU FFQ<br>average | PKU dietary<br>recalls | Wilcoxon<br>signed rank<br>(p) | Spearman<br>rank<br>correlation<br>(r) | No. children<br>consuming<br>food<br>FFQ/<br>Recall | Control FFQ<br>average | Control<br>dietary<br>recalls | Wilcoxon<br>signed rank<br>(p) | Spearman<br>rank<br>correlation<br>(r) | Mann<br>Whitney (p)<br>FFQ average<br>PKU vs<br>Control |
|--------------------------------|-----------------------------------------------------|--------------------|------------------------|--------------------------------|----------------------------------------|-----------------------------------------------------|------------------------|-------------------------------|--------------------------------|----------------------------------------|---------------------------------------------------------|
|                                |                                                     | Mean<br>g/week     | Mean<br>g/week         |                                |                                        |                                                     | Mean<br>g/week         | Mean<br>g/week                |                                |                                        |                                                         |
| Milk, cows                     | 3/4                                                 | 13.8               | 18.5                   | 0.37                           | 0.87                                   | 48/45                                               | 1832                   | 1639                          | 0.06                           | 0.79                                   | <b>&lt;0.0001</b>                                       |
| plant milk                     | 7/7                                                 | 58.0               | 34.4                   | 0.23                           | 0.54                                   | 1/2                                                 | 56                     | 40                            | >0.99                          | 0.69                                   | 0.06                                                    |
| LP milk                        | 42/38                                               | 1465               | 1105                   | <0.0001                        | 0.93                                   |                                                     |                        |                               |                                |                                        |                                                         |
| milk flavouring                | 10/4                                                | 4.8                | 3.8                    | 0.22                           | 0.26                                   | 22/17                                               | 14.2                   | 12.3                          | 0.52                           | 0.50                                   | 0.13                                                    |
| cheese                         | 3/3                                                 | 2.8                | 1.9                    | 0.75                           | >0.99                                  | 48/44                                               | 87.8                   | 90                            | 0.95                           | 0.39                                   | <b>&lt;0.0001</b>                                       |
| soft cheese                    | 5/4                                                 | 6.2                | 12.0                   | 0.19                           | 0.90                                   | 16/12                                               | 9.8                    | 12.1                          | 0.84                           | 0.29                                   | <b>0.02</b>                                             |
| LP cheese                      | 35/31                                               | 73.4               | 102                    | 0.18                           | 0.77                                   |                                                     |                        |                               |                                |                                        |                                                         |
| soya cheese                    | 1/0                                                 | 0.6                | 0                      | >0.99                          | -                                      |                                                     |                        |                               |                                |                                        |                                                         |
| dairy desserts                 | 21/21                                               | 60.8               | 86.1                   | 0.16                           | 0.71                                   | 46/42                                               | 218                    | 238                           | 0.59                           | 0.61                                   | <b>&lt;0.0001</b>                                       |
| LP desserts                    | 12/6                                                | 22.5               | 24.9                   | 0.95                           | 0.01                                   |                                                     |                        |                               |                                |                                        |                                                         |
| icecream                       | 18/7                                                | 21.6               | 15.8                   | 0.24                           | 0.37                                   | 35/19                                               | 48.0                   | 57                            | 0.91                           | 0.20                                   | 0.07                                                    |
| LP ice cream                   | 16/7                                                | 23.6               | 18.2                   | 0.26                           | 0.47                                   |                                                     |                        |                               |                                |                                        |                                                         |
| milk based ice lolly           | 10/4                                                | 10.4               | 10.2                   | 0.72                           | 0.05                                   | 7/15                                                | 5.0                    | 40.9                          | <b>&lt;0.0001</b>              | 0.52                                   | 0.36                                                    |
| fruit based ice lolly          | 27/10                                               | 60.3               | 26.3                   | <b>0.01</b>                    | 0.40                                   | 21/7                                                | 42.3                   | 26.8                          | 0.13                           | 0.42                                   | <b>0.03</b>                                             |
| cream                          | 3/1                                                 | 1.5                | 4.2                    | 0.88                           | 0.03                                   | 12/10                                               | 9.0                    | 9.1                           | 0.70                           | 0.46                                   | <b>0.01</b>                                             |
| bread                          | 3/9                                                 | 17.1               | 28.0                   | <b>0.008</b>                   | 0.65                                   | 50/48                                               | 261                    | 309                           | 0.06                           | 0.48                                   | <b>&lt;0.0001</b>                                       |
| rolls etc                      | 4/0                                                 | 2.5                | 0                      | 0.13                           | -                                      | 35/40                                               | 139                    | 204                           | <b>0.04</b>                    | 0.49                                   | <b>&lt;0.0001</b>                                       |
| LP bread                       | 45/45                                               | 431                | 474                    | 0.54                           | 0.64                                   |                                                     |                        |                               |                                |                                        |                                                         |
| LP rolls etc                   | 28/15                                               | 59.5               | 47.7                   | 0.66                           | 0.46                                   |                                                     |                        |                               |                                |                                        |                                                         |
| GF bread                       | 12/7                                                | 13.8               | 20.4                   | 0.67                           | 0.56                                   |                                                     |                        |                               |                                |                                        |                                                         |
| GF rolls etc                   | 8/5                                                 | 9.3                | 12.3                   | 0.44                           | 0.79                                   |                                                     |                        |                               |                                |                                        |                                                         |
| Breakfast cereal - wheat       | 21/16                                               | 22.8               | 27.9                   | 0.20                           | 0.71                                   | 37/39                                               | 85.2                   | 135                           | <b>0.05</b>                    | 0.58                                   | <b>0.002</b>                                            |
| Breakfast cereal-corn/rice/oat | 31/27                                               | 41.3               | 44.4                   | 0.36                           | 0.75                                   | 35/24                                               | 52.2                   | 40                            | <b>0.02</b>                    | 0.63                                   | 0.12                                                    |
| Oats/porridge                  |                                                     |                    |                        |                                |                                        | 16/7                                                | 92.3                   | 103                           | 0.62                           | 0.71                                   |                                                         |
| LP breakfast cereal            | 10/7                                                | 11.3               | 14.7                   | 0.77                           | 0.38                                   |                                                     |                        |                               |                                |                                        |                                                         |
| sweet spreads                  | 30/24                                               | 36.5               | 31.0                   | 0.19                           | 0.78                                   | 31/31                                               | 14.8                   | 18.5                          | 0.46                           | 0.45                                   | <b>0.05</b>                                             |
| chocolate/nut spread           | 18/6                                                | 17.5               | 10.1                   | 0.27                           | 0.26                                   | 21/16                                               | 16.6                   | 16.3                          | 0.69                           | 0.61                                   | 0.63                                                    |
| LP chocolate spread            | 12/3                                                | 6.3                | 5.0                    | 0.06                           | 0.52                                   |                                                     |                        |                               |                                |                                        |                                                         |

|                               |       |      |      |                   |      |       |      |      |                   |      |                   |
|-------------------------------|-------|------|------|-------------------|------|-------|------|------|-------------------|------|-------------------|
| sandwich spread               | 2/1   | 1.4  | 2.8  | >0.99             | 0.71 | 17/6  | 13.6 | 7.4  | <b>0.03</b>       | 0.41 | <b>0.002</b>      |
| LP savoury spread             | 7/0   | 5.4  | 0    | <b>0.02</b>       | -    |       |      |      |                   |      |                   |
| butter/ margarine/ oil        | 48/44 | 85.9 | 58.4 | <0.0001           | 0.63 | 50/46 | 46.8 | 46.1 | 0.74              | 0.28 | <b>&lt;0.0001</b> |
| Low fat spread                | 3/0   | 1.7  | 0    | 0.25              | -    | 8/1   | 3.0  | 0.5  | <b>0.008</b>      | 0.38 | 0.61              |
| Pasta/ rice/ couscous         | 18/11 | 33.8 | 46.7 | 0.85              | 0.68 | 49/44 | 332  | 344  | 0.70              | 0.31 | <b>&lt;0.0001</b> |
| LP pasta/ rice/ couscous      | 46/34 | 372  | 434  | 0.24              | 0.74 |       |      |      |                   |      |                   |
| tinned pasta                  | 19/4  | 41   | 23.4 | <b>0.009</b>      | 0.52 | 10/4  | 22.4 | 19.5 | 0.65              | 0.43 | <b>0.04</b>       |
| LP ready meal / Ready meal    | 7/1   | 20   | 5.3  | 0.14              | 0.06 | 10/2  | 20   | 5.6  | <b>0.04</b>       | 0.41 | 0.66              |
| potato - boil/ mash/ jacket   | 43/24 | 195  | 145  | <b>0.005</b>      | 0.74 | 47/32 | 228  | 154  | <b>0.004</b>      | 0.52 | 0.47              |
| potato - roast/ chips/ fried  | 47/40 | 196  | 231  | 0.21              | 0.37 | 48/38 | 164  | 168  | 0.79              | 0.32 | 0.12              |
| potato - processed            | 32/20 | 57.5 | 81.7 | 0.11              | 0.73 | 19/10 | 26.4 | 29.5 | 0.86              | 0.46 | <b>0.02</b>       |
| table sauce                   | 39/33 | 89.9 | 56.6 | <b>0.0003</b>     | 0.68 | 44/31 | 67.4 | 37.3 | <b>0.0008</b>     | 0.27 | 0.55              |
| gravy                         | 30/14 | 56   | 44.1 | 0.13              | 0.41 | 34/26 | 48.3 | 44.9 | 0.49              | 0.47 | 0.64              |
| mayonnaise/ dressing          | 28/25 | 51.4 | 30.9 | <b>0.04</b>       | 0.67 | 21/16 | 15.6 | 13.5 | 0.39              | 0.48 | <b>0.02</b>       |
| milk sauces                   | 9/4   | 8.8  | 10.4 | 0.96              | 0.25 | 23/5  | 24   | 13.2 | <b>0.02</b>       | 0.42 | <b>0.05</b>       |
| LP sauce                      | 4/3   | 5.5  | 2.1  | 0.44              | 0.53 |       |      |      |                   |      |                   |
| pasta sauce                   | 40/33 | 170  | 173  | 0.84              | 0.43 | 45/27 | 128  | 97   | 0.10              | 0.01 | 0.75              |
| soup                          | 30/21 | 252  | 262  | 0.21              | 0.54 | 20/6  | 87   | 40.6 | <b>0.01</b>       | 0.52 | <b>0.001</b>      |
| vegetables >100mg Phe/100g    | 36/19 | 66.5 | 29.2 | <b>&lt;0.0001</b> | 0.61 | 49/42 | 269  | 163  | <b>0.0001</b>     | 0.48 | <b>&lt;0.0001</b> |
| vegetables 75-100mg Phe/100g  | 37/21 | 116  | 86.5 | <b>0.05</b>       | 0.60 | 44/25 | 193  | 71.7 | <b>&lt;0.0001</b> | 0.55 | <b>0.03</b>       |
| vegetables <75mg Phe/100g     | 50/48 | 715  | 794  | 0.37              | 0.42 | 50/47 | 558  | 432  | <b>0.002</b>      | 0.62 | 0.22              |
| legumes                       | 17/13 | 28.3 | 26.8 | 0.47              | 0.70 | 38/28 | 147  | 158  | 0.72              | 0.52 | <b>&lt;0.0001</b> |
| fruit                         | 46/43 | 928  | 958  | 0.89              | 0.75 | 50/47 | 946  | 842  | 0.07              | 0.68 | 0.68              |
| dried fruit                   | 24/17 | 34.7 | 30.3 | 0.17              | 0.53 | 26/17 | 32.9 | 20   | <b>0.01</b>       | 0.60 | 0.79              |
| meat                          |       |      |      |                   |      | 48/48 | 290  | 314  | 0.22              | 0.50 |                   |
| fish                          |       |      |      |                   |      | 38/15 | 75.3 | 54.0 | <b>0.007</b>      | 0.52 |                   |
| processed meat/fish           |       |      |      |                   |      | 50/46 | 190  | 256  | 0.21              | 0.19 |                   |
| ham/sandwich slices           |       |      |      |                   |      | 37/30 | 38.2 | 45.9 | 0.61              | 0.56 |                   |
| LP burger/ sausage            | 27/22 | 152  | 114  | 0.16              | 0.66 |       |      |      |                   |      |                   |
| veg burger/sausage/tofu/quorn | 18/12 | 44.3 | 47.4 | 0.86              | 0.35 | 10/3  | 7.5  | 13.9 | 0.80              | 0.29 | <b>0.03</b>       |
| eggs                          | 0/1   | 0    | 0.4  | >0.99             | -    | 31/22 | 69.8 | 85.6 | 0.92              | 0.48 | <b>&lt;0.0001</b> |
| Pizza                         | 4/2   | 9.8  | 6.1  | 0.81              | 0.31 | 42/23 | 92.2 | 116  | 0.90              | 0.09 | <b>&lt;0.0001</b> |
| LP pizza                      | 34/12 | 106  | 111  | <b>0.04</b>       | 0.50 |       |      |      |                   |      |                   |
| meat pie/ pastie              | 1/0   | 0.3  | 0    | >0.99             | -    | 34/15 | 29.5 | 53.4 | 0.52              | 0.28 | <b>&lt;0.0001</b> |
| vegetable pie/ pastie         | 11/5  | 11.5 | 10.6 | 0.51              | 0.31 | 3/3   | 1.5  | 3.4  | 0.31              | 0.29 | <b>0.01</b>       |

|                                 |       |      |      |         |      |       |      |      |         |      |         |
|---------------------------------|-------|------|------|---------|------|-------|------|------|---------|------|---------|
| meat curry/ chinese/ lasagne    | 0/0   | 0    | 0    | -       | -    | 34/16 | 115  | 114  | 0.54    | 0.23 | <0.0001 |
| vegetable curry/chinese/lasagne | 21/19 | 112  | 159  | 0.08    | 0.49 | 5/3   | 11   | 12.6 | 0.78    | 0.51 | <0.0001 |
| water                           | 47/49 | 4865 | 3636 | 0.0005  | 0.60 | 47/44 | 3733 | 2560 | <0.0001 | 0.60 | 0.01    |
| fruit juice                     | 32/25 | 584  | 433  | 0.29    | 0.52 | 28/29 | 570  | 460  | 0.31    | 0.78 | 0.23    |
| smoothie                        | 14/6  | 97   | 72   | 0.06    | 0.68 | 14/6  | 106  | 54.0 | 0.05    | 0.34 | 0.57    |
| sweet drinks                    | 39/43 | 1431 | 1701 | 0.08    | 0.65 | 18/23 | 339  | 495  | 0.02    | 0.64 | <0.0001 |
| sugar-free drinks               | 15/7  | 500  | 274  | 0.005   | 0.37 | 34/33 | 2323 | 1781 | 0.01    | 0.88 | <0.0001 |
| tea/ coffee                     | 21/15 | 366  | 274  | 0.11    | 0.77 | 14/10 | 184  | 234  | 0.34    | 0.62 | 0.02    |
| hot chocolate powder            | 3/0   | 0.6  | 0    | 0.25    | -    | 20/9  | 12.8 | 8.8  | 0.08    | 0.48 | 0.002   |
| non-dairy creamer               | 2/0   | 0.5  | 0    | 0.50    | -    | 0/0   | 0    | 0    | -       | -    | 0.49    |
| biscuits                        | 22/16 | 18   | 19.8 | 0.95    | 0.54 | 46/44 | 82.3 | 115  | 0.01    | 0.50 | <0.0001 |
| cake                            | 12/18 | 17.8 | 25.1 | 0.41    | 0.54 | 44/44 | 120  | 132  | 0.81    | 0.17 | <0.0001 |
| cereal bar                      | 21/9  | 19.6 | 10.6 | 0.04    | 0.60 | 29/17 | 29.2 | 44.1 | 0.39    | 0.45 | 0.34    |
| LP biscuit                      | 34/22 | 54.5 | 38.6 | 0.29    | 0.33 |       |      |      |         |      |         |
| LP cake                         | 35/27 | 129  | 118  | 0.40    | 0.59 |       |      |      |         |      |         |
| LP cereal bar                   | 21/14 | 35.8 | 62.6 | 0.49    | 0.45 |       |      |      |         |      |         |
| puddings                        | 4/1   | 8.0  | 1.4  | 0.25    | 0.46 | 32/11 | 79.2 | 34.7 | 0.0004  | 0.43 | <0.0001 |
| LP puddings                     | 15/8  | 36   | 13.8 | 0.02    | 0.41 |       |      |      |         |      |         |
| jelly                           | 2/0   | 3    | 0    | 0.50    | -    | 12/10 | 37   | 45.5 | 0.62    | 0.69 | 0.006   |
| LP jelly                        | 25/8  | 113  | 51.1 | 0.003   | 0.53 |       |      |      |         |      |         |
| chocolate                       | 10/8  | 9.2  | 13.7 | 0.50    | 0.65 | 47/36 | 76.2 | 74.1 | 0.41    | 0.22 | <0.0001 |
| LP chocolate                    | 29/13 | 36.9 | 23.7 | 0.06    | 0.43 |       |      |      |         |      |         |
| gummy sweets                    | 3/3   | 6.0  | 1.6  | 0.40    | 0.06 | 31/14 | 37.2 | 11.0 | 0.0002  | 0.19 | <0.0001 |
| vegetarian gummy sweets         | 38/10 | 64.5 | 9.1  | <0.0001 | 0.21 |       |      |      |         |      |         |
| other sweets                    | 22/21 | 30.2 | 28.1 | 0.34    | 0.64 | 11/10 | 12.0 | 9.8  | 0.89    | 0.37 | 0.002   |
| sugar                           | 23/21 | 17.5 | 17.3 | 0.54    | 0.50 | 11/13 | 5.0  | 5.9  | 0.30    | 0.56 | 0.0004  |
| crisps                          | 49/42 | 69.8 | 99.6 | 0.004   | 0.64 | 43/43 | 49.2 | 75.1 | 0.0009  | 0.66 | 0.01    |
| nuts/ seeds                     | 0/0   | 0    | 0    | -       | -    | 13/3  | 2.9  | 1.7  | 0.14    | 0.15 | 0.003   |
| LP crisps                       | 4/2   | 4.8  | 3.5  | 0.87    | 0.72 |       |      |      |         |      |         |
| crackers                        | 12/12 | 5.8  | 15.5 | 0.04    | 0.69 | 29/15 | 12.8 | 14.8 | 0.66    | 0.29 | 0.002   |
| LP crackers                     | 18/8  | 8.7  | 10.3 | 0.59    | 0.46 |       |      |      |         |      |         |

n = number respondents consuming that food; **bule**: PKU foods only; **purple**: Control foods only; -: no; LP=low protein; GF=gluten free; Phe=phenylalanine

Table S4: Kappa coefficient statistics FFQ vs Dietary Recalls

|              | Kappa Score | P-value | Level of Agreement |
|--------------|-------------|---------|--------------------|
| Energy kJ    | 0.35        | <0.001  | Fair               |
| Carbohydrate | 0.51        | <0.001  | Moderate           |
| Protein      | 0.49        | <0.001  | Moderate           |
| Fat          | 0.21        | 0.03    | Fair               |
| Starch       | 0.52        | <0.001  | Moderate           |
| Fibre        | 0.33        | <0.001  | Fair               |
| Sugars       | 0.44        | <0.001  | Moderate           |

## Supplementary S1: FFQ SCRIPT (PKU)

- This questionnaire asks you questions about what you/your child eats.
  - I would like you to tell me about all the foods and drinks you/your child eats regularly.
  - The questionnaire lists 69 commonly eaten foods, food groups or drinks.
  - For each food/food group there is a portion size suggested e.g. teaspoons, tablespoons, bowl, glass, slice.
  - A portion size booklet is also provided. This will help you complete the food diary.  
(SHOW THEM THE BOOKLET)  
*(there is a \* next to the portions on the FFQ for which there is a picture(s) - for tablespoons or teaspoons refer to the picture on the front of the portion size booklet, for 1 glass (200ml) refer to the Drinks pictures in the portion size booklet)*
  - I will ask you to tell me the number of times a 'food portion' is taken each day.
  - If you/your child's eats twice the portion size shown, we will count this as 2 portions or if you eat half the portion size shown we will count it as ½ a portion.
  - Then I will ask you the number of days a week this amount is eaten.
  - If a food is eaten weekly but not daily, tell me how many portions per week.
  - If a food is eaten less than once a week we will record it as '0'.
  - For food items made up of different ingredients e.g. jam sandwich, I will need to ask you about what ingredients are used e.g. 2 slices low protein bread, 1 teaspoon margarine, 2 teaspoons jam.
  - If there are food or drinks you/your child has regularly that are not listed, we can add these in.
- 

### General Question (for all entries):

- This is the *(name of heading in table e.g. MILK)* group
- How much/many *(read out food word-for-word from FFQ)* would you/they have a day in terms of *(read out portion size units from questionnaire: i.e. ml/g/slices/pots/tablespoons/teaspoons/pieces/cups/bowls/glasses/serves/packages/exchanges)* (refer to portion size in booklet were applicable). This is *(amount & type of food in picture in portion size booklet)*, how much would you/your child have a day compared with this? More or less than this?
- Do you/your child have this amount every day?
- If you/your child doesn't have it every day how many times a week would you/your child have this much?



*(Only put one number in each box NOT a range – ask them to indicate what happens most often e.g. rather than 3-4 times a week specify only 3 or 4. Portion sizes can be in halves or whole numbers).*

- Are there any other foods in that group that you/your child eats?
- 

Example 1:

This is the **MILK** group.

How much **Milk – full fat, semi-skimmed, skimmed, condensed, soya (include on cereal, in drinks e.g. tea, in foods e.g. mash potato)** would you have a day in terms of **ml**? *(show them the picture of a glass of milk in the portion size booklet)* This is a 200ml glass of milk, so in total how much would you have a day compared with this? More or less than this? If you don't have it every day how many times a week would you have this much?

Example 2:

This is the **PASTA, RICE AND POTATO** group.

How much **low protein pasta, noodles, rice, couscous (cooked)** would you have a day in terms of **grams**? *(show them the picture of the low protein pasta in the portion size booklet).* This is 80g and 160g of low protein pasta, how much would you have a day compared with this? More or less than either of these amounts? If you don't have it every day how many times a week would you have this much?

Example 3:

This is the **SAVOURY SNACKS** group.

How much **Potato crisps, corn snacks, rice snacks, popcorn** would you have a day in terms of **a small packet (15-25g)**? Would you have more or less than one packet a day? Or if not every day, how many times a week?

---

## **ADDITIONAL QUESTIONS**

*Read questions out but show them the responses so they can indicate their answers. Indicate that they need to answer based on what usually happens on most days.*

*E.g.*

*Q.1. If a certain meal/snack is not eaten every day, but more often than not, then still tick the box. If not, leave it blank.*

*Q.3. If salt is usually added to food then tick yes.*

*Q.8/10. If protein exchanges/protein substitute are not always eaten at a particular time of day, only tick the box if it is more often than not.*

## Supplementary S2: FFQ SCRIPT (CONTROL)

- This questionnaire asks you questions about what you/your child eats.
  - I would like you to tell me about all the foods and drinks you/your child eats regularly.
  - The questionnaire lists 69 commonly eaten foods, food groups or drinks.
  - For each food/food group there is a portion size suggested e.g. teaspoons, tablespoons, bowl, glass, slice.
  - A portion size booklet is also provided. This will help you complete the food diary.  
(SHOW THEM THE BOOKLET)  
*(there is a \* next to the portions on the FFQ for which there is a picture(s) - for tablespoons or teaspoons refer to the picture on the front of the portion size booklet, for 1 glass (200ml) refer to the Drinks pictures in the portion size booklet)*
  - I will ask you to tell me the number of times a 'food portion' is taken each day.
  - If you/your child's eats twice the portion size shown, we will count this as 2 portions or if you eat half the portion size shown we will count it as ½ a portion.
  - Then I will ask you the number of days a week this amount is eaten.
  - If a food is eaten weekly but not daily, tell me how many portions per week.
  - If a food is eaten less than once a week we will record it as '0'.
  - For food items made up of different ingredients e.g. jam sandwich, I will need to ask you about what ingredients are used e.g. 2 slices white bread, 1 teaspoon margarine, 2 teaspoons jam.
  - If there are food or drinks you/your child has regularly that are not listed, we can add these in.
- 

### General Question (for all entries):

- This is the *(name of heading in table e.g. MILK)* group
- How much/many *(read out food word-for-word from FFQ)* would you/they have a day in terms of *(read out portion size units from questionnaire: i.e. ml/g/slices/pots/tablespoons/teaspoons/pieces/cups/bowls/glasses/serves/packages)* (refer to portion size in booklet where applicable). This is *(amount & type of food in picture in portion size booklet)*, how much would you/your child have a day compared with this? More or less than this?
- Do you/your child have this amount every day?
- If you/your child doesn't have it every day how many times a week would you/your child have this much?

*(Only put one number in each box NOT a range – ask them to indicate what happens most often e.g. rather than 3-4 times a week specify only 3 or 4. Portion sizes can be in halves or whole numbers).*

- Are there any other foods in that group that you/your child eats?
- 

Example 1:

This is the **MILK** group.

How much **Milk – full fat, semi-skimmed, skimmed, condensed, soya (include on cereal, in drinks e.g. tea, in foods e.g. mash potato)** would you have a day in terms of **ml**? *(show them the picture of a glass of milk in the portion size booklet)* This is a 200ml glass of milk, so in total how much would you have a day compared with this? More or less than this? If you don't have it every day how many times a week would you have this much?

Example 2:

This is the **PASTA, RICE AND POTATO** group.

How much **pasta, noodles, rice, couscous (cooked)** would you have a day in terms of **grams**? *(show them the picture of the pasta in the portion size booklet)*. This is 80g and 160g of pasta, how much would you have a day compared with this? More or less than either of these amounts? If you don't have it every day how many times a week would you have this much?

Example 3:

This is the **SAVOURY SNACKS** group.

How much **Potato crisps, corn snacks, rice snacks, popcorn** would you have a day in terms of **a small packet (15-25g)**? Would you have more or less than one packet a day? Or if not every day, how many times a week?

---

## **ADDITIONAL QUESTIONS**

*Read questions out but show them the responses so they can indicate their answers. Indicate that they need to answer based on what usually happens on most days.*

*E.g.*

*Q.1. If a certain meal/snack is not eaten every day, but more often than not, then still tick the box. If not, leave it blank.*

*Q.3. If salt is usually added to food then tick yes.*

*Q.8/10. If protein exchanges/protein substitute are not always eaten at a particular time of day, only tick the box if it is more often than not.*

### Supplementary S3: SCRIPT FOR 24 DIETARY RECALL (PKU)

TO BE COMPLETED BY THE RESEARCHER BY INTERVIEW (FACE-TO-FACE OR TELEPHONE)  
WITH SAME PARENT EACH TIME (5-10Y CHILD) OR WITH THE CHILD ONLY (11-16Y)

We want to find out what you/your child eats and drinks on a typical day.

This includes all food, drinks, snacks and supplements eaten at home or outside the home including school (if not known can we ask your child?).

We also need to know how much was eaten – e.g. number of slices, tablespoons, teaspoons, cups, grams, ounces, ml **or exchanges**.

Only include the amount of food actually eaten, not what was offered.

We also need to know:

- brand names of products if known
- types of food (e.g. **low protein, gluten-free or regular**; type of milk: full fat/semi-skim/skim; type of spread: low fat/regular; type of bread: wholemeal/ white bread/half 'n half)
- how foods were cooked (e.g. fried, grilled, baked, boiled).
- If you can provide recipes or estimate quantities for home cooked foods.

---

We want to record everything you/your child had to eat or drink yesterday.

Was yesterday a normal day? i.e. no parties, celebration day, illness.

If yesterday was not normal can you tell me about the day before (or the last 'normal' day you can recall).

What day of the week was this? (*circle the day at the top of the diary page*).

---

Starting with the beginning of the day, approximately what time was the first food or drink taken? (*record estimated time e.g. 8am*).

What food/drink was taken first?

- **Brand, type, low protein/gluten-free, how cooked/prepared, amount eaten, recipe** if applicable?

What other food/drink was taken at that time?

- **Brand, type, low protein/gluten-free, how cooked/prepared, amount eaten, recipe** if applicable?

REPEAT ABOVE QUESTIONS UNTIL ALL FOOD/DRINK CONSUMED AT THAT TIME IS LISTED

Check: did you/they have any:

- cereal/toast/**low protein milk** (**Brand, type, low protein/gluten-free**, how **cooked/prepared**).
- spreads on bread/toast? (**Brand, type, amount**).
- drinks e.g. drink/juice/water/milk/low protein milk? What type of cup, glass, mug or carton?
- anything added to food e.g. salt, seasoning, butter
- **protein substitute (Brand, amount taken).**

Any other comments about that meal? (*e.g. how they felt, eaten later/earlier than usual*).

**REPEAT THE FOLLOWING SCRIPT FOR EACH SEPARATE MEAL/SNACK CONSUMED**

When is the next time you/they have something to eat/drink? (record estimated time).

What food/drink was taken?

- **Brand, type, low protein/gluten-free, how cooked/prepared, amount eaten, recipe** if applicable?

What other food/drink was taken at that time?

- **Brand, type, low protein/gluten-free, how cooked/prepared, amount eaten, recipe** if applicable?

Did you/they have any:

- bread/vegetables/fruit/yoghurt/crisps/biscuits/pudding/other snacks/**low protein milk (Brand, type, low protein/gluten-free, how cooked/prepared)**.
- spreads on bread/toast? (**Brand, type, amount**).
- drinks e.g. juice/water/milk/low protein milk? What type of cup, glass, mug or carton?
- anything added to food e.g. salt, seasoning, butter
- **protein substitute (Brand, amount taken).**

Do you/they have any bedtime drinks or any drinks overnight?

Any other comments about that meal? e.g. how they felt, eaten later/earlier than usual.

---

Now I am going to read back what you have told me for each meal and snack, and if there is anything missing or if anything is incorrect please let me know.

**READ THROUGH EACH MEAL/SNACK CHECKING FOOD/DRINK, QUANTITY, BRAND, TYPE (**LOW PROTEIN/GLUTEN-FREE/REGULAR**), COOKING METHOD. **CHECK THAT ALL PROTEIN SUBSTITUTE AND LOW PROTEIN MILK IS RECORDED.****

---

## 24 HOUR DIETARY RECALL

SUBJECT NO: \_\_\_\_\_

INITIALS: \_\_\_\_\_

DATE: \_\_\_\_\_

**Please circle the correct day: Mon/ Tue / Wed / Thu / Fri / Sat / Sun**

[illegible]

**EXAMPLE:**

**Please circle the correct day: Mon/**Tue **/ Wed / Thu / Fri / Sat / Sun**

| <b>Time of day</b> | <b>Amount eaten</b><br>g / oz / ml / slices<br>/ tbsp / tsp | <b>Type of food / drink / protein substitute</b><br>Include brand names, method of cooking,<br>recipes, type (e.g. <u>low protein</u> , skim, low fat) | <b>Comments</b>            |
|--------------------|-------------------------------------------------------------|--------------------------------------------------------------------------------------------------------------------------------------------------------|----------------------------|
| e.g.<br>8am        | 174ml<br>Small bowl<br>100ml                                | PKU Cooler 20<br>Low protein cereal ( <u>Loprofin</u> strawberry flakes)<br><u>Prozero</u>                                                             | Breakfast later than usual |
| 11am               | 1<br>47g<br>1 glass                                         | Apple<br>Yoghurt (Petit Filous)<br>Sugar free squash                                                                                                   |                            |
| 1.00-<br>1.30pm    | 2 slices<br>2 tsp<br>2 tsp<br>16g packet<br>174ml           | Low protein bread ( <u>Mevalia</u> )<br>Butter<br>jam<br>Quavers<br>PKU Cooler 20                                                                      | Only ate half              |
| 3.30pm             | 2<br>200ml                                                  | Low protein biscuits (wafers)<br>Sugar free squash                                                                                                     |                            |
| 5.30-<br>6.00pm    | 1<br>1 ½ exchanges<br>60g<br>2 tbsp<br>174ml<br>1 glass     | Low protein sausage<br>Potato chips (oven baked)<br>Broccoli<br>Carrots<br>PKU Cooler 20<br>water                                                      |                            |
| 7pm                | 1                                                           | <u>Mevalia</u> fruit bar                                                                                                                               |                            |

## Supplementary S4: SCRIPT FOR 24 DIETARY RECALL (CONTROL)

TO BE COMPLETED BY THE RESEARCHER BY INTERVIEW (FACE-TO-FACE OR TELEPHONE)  
WITH SAME PARENT EACH TIME (5-10Y CHILD) OR WITH THE CHILD ONLY (11-16Y)

We want to find out what you/your child eats and drinks on a typical day.

This includes all food, drinks, snacks and supplements eaten at home or outside the home including school (if not known can we ask your child?).

We also need to know how much was eaten – e.g. number of slices, tablespoons, teaspoons, cups, grams, ounces or ml.

Only include the amount of food actually eaten, not what was offered.

We also need to know:

- brand names of products if known
- types of food (e.g. type of milk: full fat/semi-skim/skim; type of spread: low fat/regular; type of bread: wholemeal/ white bread/half 'n half)
- how foods were cooked (e.g. fried, grilled, baked, boiled).
- If you can provide recipes or estimate quantities for home cooked foods.

---

We want to record everything you/your child had to eat or drink yesterday.

Was yesterday a normal day? i.e. no parties, celebration day, illness.

If yesterday was not normal can you tell me about the day before (or the last 'normal' day you can recall).

What day of the week was this? (*circle the day at the top of the diary page*).

---

Starting with the beginning of the day, approximately what time was the first food or drink taken? (*record estimated time e.g. 8am*).

What food/drink was taken first?

- **Brand, type, how cooked/prepared, amount** eaten, **recipe** if applicable?

What other food/drink was taken at that time?

- **Brand, type, how cooked/prepared, amount** eaten, **recipe** if applicable?

REPEAT ABOVE QUESTIONS UNTIL ALL FOOD/DRINK CONSUMED AT THAT TIME IS LISTED

Check: did you/they have any:

- cereal/toast (**Brand, type, how cooked/prepared**).
- spreads on bread/toast? (**Brand, type, amount**).
- drinks e.g. juice/water/milk? What type of cup, glass, mug or carton?



- anything added to food e.g. salt, seasoning, butter

Any other comments about that meal? (*e.g. how they felt, eaten later/earlier than usual*).

*REPEAT THE FOLLOWING SCRIPT FOR EACH SEPARATE MEAL/SNACK CONSUMED*

When is the next time you/they have something to eat/drink? (record estimated time).

What food/drink was taken?

- **Brand, type, how cooked/prepared, amount** eaten, **recipe** if applicable?

What other food/drink was taken at that time?

- **Brand, type, how cooked/prepared, amount** eaten, **recipe** if applicable?

Did you/they have any:

- bread/vegetables/fruit/yoghurt/crisps/biscuits/puddings/other snacks (**Brand, type, how cooked/prepared**).
- spreads on bread/toast? (**Brand, type, amount**).
- drinks e.g. juice/water/milk/low protein milk? What type of cup, glass, mug or carton?
- anything added to food e.g. salt, seasoning, butter

Do you/they have any bedtime drinks or any drinks overnight?

Any other comments about that meal? e.g. how they felt, eaten later/earlier than usual.

---

Now I am going to read back what you have told me for each meal and snack, and if there is anything missing or if anything is incorrect please let me know.

*READ THROUGH EACH MEAL/SNACK CHECKING FOOD/DRINK, QUANTITY, BRAND, TYPE, COOKING METHOD.*

---

## 24 HOUR DIETARY RECALL

SUBJECT NO: \_\_\_\_\_

INITIALS: \_\_\_\_\_

DATE: \_\_\_\_\_

***Please circle the correct day: Mon/ Tue / Wed / Thu / Fri / Sat / Sun***

[illegible]

**EXAMPLE:**

*Please circle the correct day: Mon/Tue/Wed/Thu/Fri/Sat/Sun*

| <b>Time of day</b> | <b>Amount eaten</b><br>g / oz / ml / slices<br>/ tbsp / tsp | <b>Type of food / drink / protein substitute</b><br>Include brand names, method of cooking,<br>recipes, type (e.g. low protein, skim, low fat) | <b>Comments</b>            |
|--------------------|-------------------------------------------------------------|------------------------------------------------------------------------------------------------------------------------------------------------|----------------------------|
| e.g.<br>8am        | 200ml<br>Small bowl<br>100ml                                | Orange juice<br>cereal (Special K)<br>Milk (Skim)                                                                                              | Breakfast later than usual |
| 11am               | 1<br>47g<br>1 glass                                         | Apple<br>Yoghurt (Petit Filous)<br>Sugar free squash                                                                                           |                            |
| 1.00-<br>1.30pm    | 2 slices<br>2 tsp<br>2 tsp<br>16g packet<br>200ml           | bread (white)<br>Butter<br>jam<br>Quavers<br>water                                                                                             | Only ate half              |
| 3.30pm             | 2<br>200ml                                                  | biscuits (chocolate digestive)<br>Sugar free squash                                                                                            |                            |
| 5.30-<br>6.00pm    | 2<br>15<br>60g<br>2 tbsp<br>200ml<br>1 glass                | sausages<br>Potato chips (oven baked)<br>Broccoli<br>Carrots<br>Sugar free squash<br>water                                                     |                            |
| 7pm                | 1 square                                                    | Flap jack                                                                                                                                      |                            |
